# Supplementary material for: TRIM66 reads unmodified H3R2K4 and H3K56ac to respond to DNA damage in embryonic stem cells
Source: Nat Commun. 2019 Sep 19;10:4273. doi: 10.1038/s41467-019-12126-4 (PMC6753139; doi:10.1038/s41467-019-12126-4)
Supplement: Supplementary file 4 — Source Data [file 41467_2019_12126_MOESM4_ESM.xlsx]

## Sheet: Fig. 3a
fig.3a
		WB	anti-γ-H2AX （abcam）
			anti-GAPDH （Bioworld）

## Sheet: Fig.3b
Fig.3b
		WT	TRIM66 KO-1	TRIM66 KO-2
	cells with＞5 γ-H2Ax foci (%) replicate 1#	7.89	66.67	74.28
	cells with＞5 γ-H2Ax foci (%) replicate 2#	6.45	71.54	68.47
	cells with＞5 γ-H2Ax foci (%) replicate 3#	7.32	73.86	77.23

## Sheet: Fig.3c
Fig.3c
	WB	anti-γ-H2AX （abcam）
		anti-GAPDH （Bioworld）

## Sheet: Fig. 3e
	Fig. 3e
		WT	TRIM66 KO-1	TRIM66 KO-2
	average tail moment	12.1739	17.985	17.1099

## Sheet: Fig. 3g
	Fig. 3g
			% cells with chromosome breaks	replicate 1#	replicate 2#	replicate 3#
			WT	4.76	5.33	6.94
			Trim66 KO-1	23.22	18.96	19.68
			Trim66 KO-2	19.38	21.36	17.93
			% cells with chromosome ends fusion	replicate 1#	replicate 2#	replicate 3#
			WT	8.69	6.55	7.48
			Trim66 KO-1	20.36	21.34	18.54
			Trim66 KO-2	23.48	17.68	19.37

## Sheet: Fig.4e
	Fig.4e			WB	anti-HA-tag（abcam）
					anti-H3K56ac（abcam）
				IP	anti-HA-tag（Sigma）

## Sheet: Fig.4f
			WB	anti-γ-H2AX （abcam）
	Fig.4f			anti-HA-tag（abcam）
				anti-GAPDH （Bioworld）

## Sheet: Fig.4g
	Fig.4g
			WT	Trim66 KO	KO+Ctl	KO+WT	KO+N1123A	KO+D986A
		average tail moment	1.79318	49.8823	39.0397	1.26984	49.4688	45.1879

## Sheet: Fig.4h
	Fig.4h
			% cells with chromosome breaks	replicate 1#	replicate 2#	replicate 3#
			WT	3.846	5.9	5.398
			Trim66 KO	14.929	19.231	17.94
			Trim66 KO+ctrl	19.048	23.75	21.274
			Trim66 KO+WT	4.545	5.625	4.642
			Trim66 KO+N1123A	16.129	16.709	14.381
			Trim66 KO+D986A	14.815	14.286	13.556
			% cells with chromosome ends fusion	replicate 1#	replicate 2#	replicate 3#
			WT	7.538	6.25	12.894
			Trim66 KO	31.579	17.231	27.405
			Trim66 KO+ctrl	19.048	26	19.524
			Trim66 KO+WT	9.091	10.526	9.8085
			Trim66 KO+N1123A	19.355	16.241	19.298
			Trim66 KO+D986A	18.519	22.429	18.974

## Sheet: Fig.5a
	Fig.5a
			WB
				anti-H3K56ac（abcam）
				anti-Histone H3（abcam）
				anti-GAPDH（Bioworld）

[truncated: 37 more sheets: Fig.5b, Fig.5c, Fig.5e, Fig.5g, Fig.5h, Fig.5i, Fig.5j, Fig.6a, Fig.6b, Fig.6c, Fig.6e, Fig.6f, Fig.6g, Fig.6h, Fig.6i, Fig.6j, Fig.7b, Fig.7e, Fig.7h, Fig.S1e …]
